# Supplementary material
Source: PubMed Central journal article supplement (PMC6052274)
Supplement: AEM.02882-17_zam015188655s1.pdf [file AEM.02882-17_zam015188655s1.pdf]

# Supplemental Material:

## A Stable, Autonomously Replicating Plasmid Vector Containing *Pichia pastoris* Centromeric DNA

Yasuyuki Nakamura<sup>1,†</sup>, Teruyuki Nishi<sup>1,2,†</sup>, Risa Noguchi<sup>3</sup>, Yoichiro Ito<sup>1</sup>, Toru Watanabe<sup>2</sup>, Tozo Nishiyama<sup>2</sup>, Shimpei Aikawa<sup>1,‡</sup>, Tomohisa Hasunuma<sup>1</sup>, Jun Ishii<sup>1,\*</sup>, Yuji Okubo<sup>2</sup>, Akihiko Kondo<sup>1,4,\*</sup>

<sup>1</sup>Graduate School of Science, Technology and Innovation, Kobe University, Kobe, Japan

<sup>2</sup>Biotechnology Research Laboratories, Kaneka Corporation, Takasago, Japan

<sup>3</sup>Technology Research Association of Highly Efficient Gene Design (TRAHED), Kobe, Japan

<sup>4</sup>Department of Chemical Science and Engineering, Graduate School of Engineering, Kobe University, Kobe, Japan

\*Correspondence to: Jun Ishii

Graduate School of Science, Technology and Innovation, Kobe University, 1-1 Rokkodai, Nada, Kobe 657-8501, Japan

Tel: +81-78-803-6356; Fax: +81-78-803-6192; E-mail: junjun@port.kobe-u.ac.jp

\*Correspondence to: Akihiko Kondo

Graduate School of Science, Technology and Innovation, Kobe University, 1-1 Rokkodai, Nada, Kobe 657-8501, Japan

Tel: +81-78-803-6196; Fax: +81-78-803-6196; E-mail: akondo@kobe-u.ac.jp

†These authors equally contributed to this work.

‡Present address: Biological Resources and Post-Harvest Division, Japan International Research Center for Agricultural Sciences (JIRCAS), 1-1 Ohwashi, Tsukuba, Ibaraki 305-8686, Japan

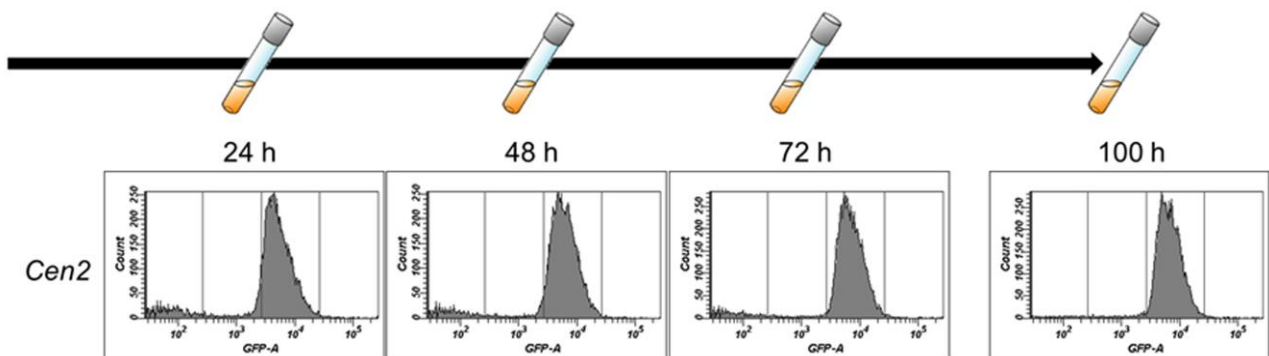

**Figure S1.** Evaluation of autonomously replicating activity and plasmid retention in *P. pastoris*. CBS7435 harboring pUC19-Cen2-EGFP (*Cen2*) was grown in BMGY medium with 200  $\mu\text{g}/\text{mL}$  Zeocin for 100 h. The GFP expression level of each cell was measured by FCM, and the histogram data from 10,000 cells per strain are shown. The vertical axis indicates the number of cells, and the horizontal axis indicates the green fluorescence signal (GFP-A). For each strain, three different transformants were analyzed, and one typical histogram is displayed.

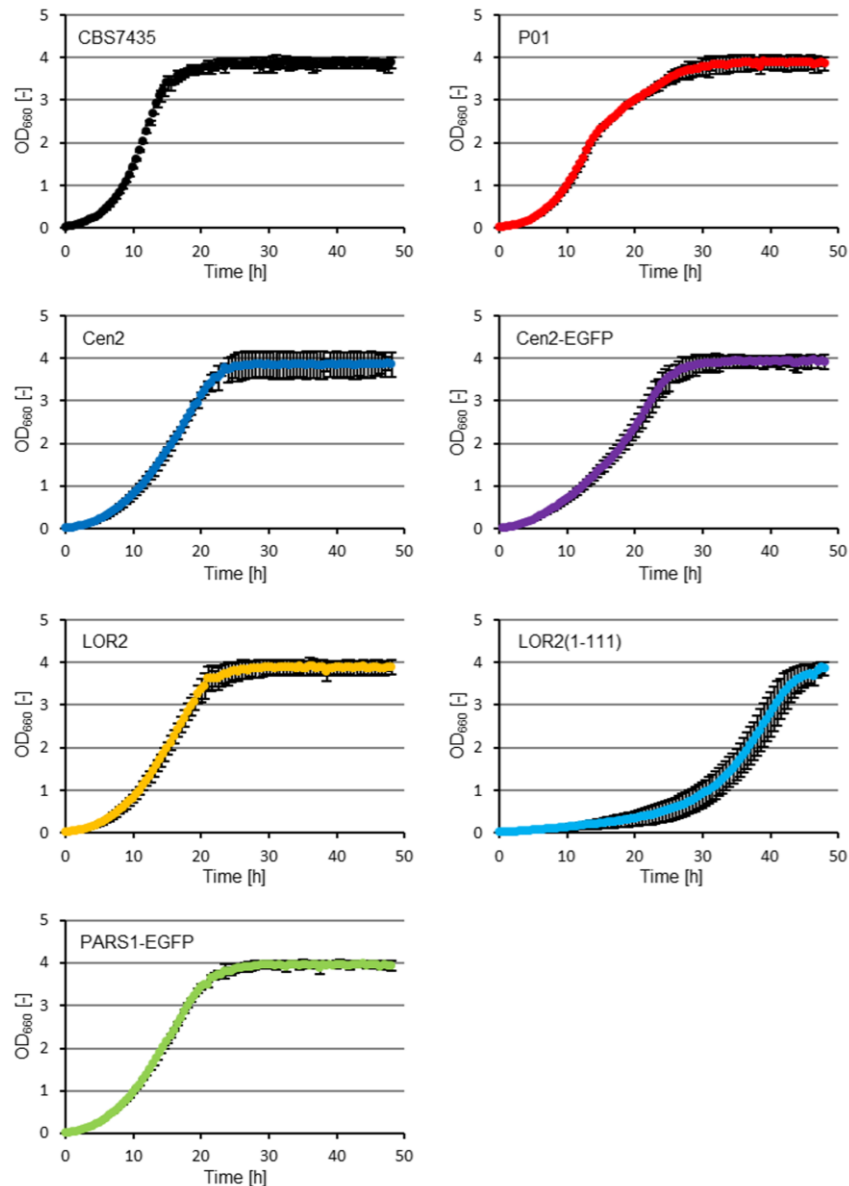

**Figure S2.** Measurement of cell growth. The strain CBS7435 was grown in BMGY medium without Zeocin for 48 h. The strain P01 and CBS7435 harboring pUC19-Cen2 (Cen2), pUC19-Cen2-EGFP (Cen2-EGFP), pUC19-LOR2 (LOR2), pUC19-LOR2(1-111) (LOR2(1-111)) and pUC19-PARS1-EGFP (PARS1-EGFP) were grown in BMGY medium with 200  $\mu\text{g}/\text{mL}$  Zeocin for 48 h. Cell growth was automatically monitored every 30 min in L-shaped test tubes by using a Bio-photorecorder. Error bars represent the standard deviation from three independent transformants ( $n = 3$ ).

**Table S1.** Putative centromeric DNA sequences.

| Chromosome | Accession number | Length (bp) | Length of putative centromere region (bp) |
|------------|------------------|-------------|-------------------------------------------|
| 1          | FR839628.1       | 2,894,792   | 5,354                                     |
| 2          | FR839629.1       | 2,396,129   | 6,655                                     |
| 3          | FR839630.1       | 2,263,199   | 6,181                                     |
| 4          | FR839631.1       | 1,825,687   | 6,229                                     |

| Chromosome | Left Outer Repeat (LOR) position | Central Core (CC) position | Right Outer Repeat (ROR) position |
|------------|----------------------------------|----------------------------|-----------------------------------|
| 1          | 1,401,537 - 1,403,528            | 1,403,529 - 1,404,898      | 1,404,899 - 1,406,890             |
| 2          | 843,845 - 846,543                | 846,544 - 847,800          | 847,801 - 850,499                 |
| 3          | 34,397 - 37,045                  | 37,046 - 37,928            | 37,929 - 40,577                   |
| 4          | 78,869 - 81,427                  | 81,428 - 82,538            | 82,539 - 85,097                   |

**Table S2.** Sequence list.

LOR2 (2,699 bp)

5'-CCAATCAAACAAGGTGACTTGCGCGAAGCAATGATTTGTGGATGGGCTGCGGTATGGCAGCATAA  
CAATGCAACGCTATTTTCAGAAATTGTAAAGTGTAAGGAAATATTC AACCCATAAAGAATCTACCGA  
AACGTAGGATAAATAATTTCCACAGAGTACACTTTTGGTTTTTATGGACGGCGTTGAGTTGCACAGAT  
GATGGAATATTGTGATAAAATACGCTATATAATTTGGAGACCCTAAGATCAAGTGGACTAGGTCGATT  
GCGTATATTAGGGTATTAAAGACTTACTTAATTCTATAAGAGCTCGGCAAGCTATATTCTCAGTTCCTT  
CGCAGTCGACCTTCAGTGCCAAAACCTTTAAAGTGGACGGGTGTTTTCTAAAGATTGCTATTGTTCA  
ATTGCCCGGTTTTTTAACCGCTGAAAACCAAGTGGCAAGAGTGGACTACGTGCGCATTGCAATTTGTAT  
AATCCATAATAATTTGTTCCACGGCCTTAAGTTATTGTACTGTTTGCTCAATTTGAAGCGGAATATCC  
GTCCTAGTCTCGAATCCTTATTTAAGTACCGGTATCATTTGCATATCCTCTCAGCCCTCAAACGCCCAT  
TCTTTATAGTAATGGTTATGTATTAATCGACTACGATGATTGACTCAGGGAGGCACGAATAGTATAATTT  
GTAACCTTGCAAGTGGGAAGCTAATTTCCGGTGTCTTGAAAGACGAGGTTAAAAATTTGAACCCAAAC  
CGATTTTACCGGAGATCCTACCTCAAATTAGAACAACCTTTAAAGCTTTCAAGGAATTGAAATTCATC  
TTTATAGACCGTAATCTTTGAAGAGTAATCAATGTAAGAGCAAGTTCTAAAGAGAGGATCCAAATT  
CCTTCTGATAGCAATTGTAAGGAGCTGCAAAGTTCAACATAATAATTTGCGATAGTAACCGTCCCTACGG  
ATACTTAAATCGGTATCAAAGAGTGACCAATCCTGAATCAGTGTAGTGCAAAAAGAAATAACGATGA  
TAAACGAATCAAGATTCTGATGAGTTGTCCAAGACGGGGCTATCATAATATTTAAAAAATAGAACCTA  
CTAATTTAACAAGGTAAATCTCATAGATTTAAGTTTCACGACTAGCTTAGCTACCACTCAAATAAGCTC  
CCGCTTGTTTCATTCGGCTGGGGTCTCCAATCTCCATCTCCAATGGATATTTTTTTTTTTAAGTGGAGAGA  
GATGTTTCAGTAAACTGTGAGTTCAGTTGTCAGAAGCAACCAATATTTACCATGGAGACGAATAAGCA  
GATATTATATACTCTATTTTTACAGCCCTTTTGTATAATCCTCAGGGATGGTTGGCGCTTCCCTGTGTTT  
CAAGTAACCACACTCTTCAAGTTGGAAATGCAAAAAGGTCCCAATGCATGCTCCCAAGTCATACTGAA  
TACAGAGATAGATTCTTTGAATTGGATCGATCTCTAATGAAATTCATGGATGAGAAGAGAGTGTAAAA  
AACTTTGCCCAACTAAATACTTTATCTGAATGAATCATTAAGAACACGACAAGTTCAGTATGTTGC  
TTGGAGCCTCCGATTCACAGTCTTGTAAGTAGTGCGTGTTTTCAAATATTTGCATTAGCAATCCCTCCA  
AGTAGCCACATAGGGACCAAAAAATAGTATAGTTTGTGGGGGGAAGGGAGTAGGAATTGCTT  
TCGAAATGGTTAACTCCTGCTTAGTTTCATTTAAAAAATGAATAGAGAAGTAGATACAGAATACTTTG  
TAAGACTGCTTACATGAATGATGCCAGAGAGTGTGCCGAAAGATCTACATGCTACTAAATTTACTATC  
AATAGGGATAAAATGTATTAGGCTACCTACTATGCCGTATTGGAAAGGCGAAGTGCTTTGTATGCAAG  
GGATTGGGGCATAGGCAAACGGATCTATGACAAGAGATACGAAATTACTTCTGTTACCCACTCTGCTC  
CTACCAAACCAATATATCTGTGACCAAAAATATCATTTGCTTGTGCTCCACATAGCGGCCAGGCTC  
AAAGAGAACACTAGATCTGCTTTCAGACATTACCGCGTGCAAATATGACAAGTCACTAGGTGATGAA  
CTAGTCGATAAAACCAAAAACGATCTGATCAATAACTTGACAACATCGTTCTTATCGGATTTCTAGCT  
CTTGAATAGTCAAATGCTGAGTTCATTTTAAAGTGAATATTTTTACCGAAGTCGATTTTAGCCCAT  
AGTCAAACAACAGAAGAGAAAAGACAAACCTTCTTTTTCATGACACATGAAACAATCACAAAAAT  
TGAGTCATATTACGGTTTCAATTTCTGCTGTTTGTATAAGTCATTGGCTGGCAAACACATCTCCTGGCC  
TCATACTGAAAATATATGAAGATAACTGCTTCTACCAATTTCAATTGATCAAGGTTCTACCCATACGTAT  
AGTTCCAGAGCATGATGTTAGGGAAACTTACAGGGATGATGTGGGCCACAGCATAATATCAACAATA  
CCTAACAATCGGTATTTAATTCATAGATATTCATACCAATTTCTCCACGATGAGAAGGGGCGACTCCTC  
TTCTTGGACGTTCTGAAAATACAGGTACGCTCACGTCAGTGCCTGAGCACATACAGCGACGTTAGTA  
TCAATCTTCTGGGACATCTCTAATGCTCTAAAATGAAGAAAAAGT-3'

CC2 (1,257 bp)

5'-AAAATTAGTATCAGTTGGCCATGCGACCAAGCCTGTTGGAACGCAAAGCATATCCGAATTATGGT  
TGGA AATTACCTTCGACCTTCAAACACTAAACTCTTCACAGGGCTATTATTCCAGCTATTGCAGAACT  
TCATACGAATTTGGGCTTGCTAAAAATTGGCAGGATCGTTCTTCAATAACTGAATACAGTATTGTACCT  
ATTCAAGCAGTTAGTCCATACTTAGGGCCTTCCTAGCCTGTCCAGTCTACCATTAACGAAAGTTCTGA  
GCTGTGTCTATCCAAATTAATTTGTGTGAGAACCTACGTAACCACTATAAGTCTCATAACGTTTTTTGAA  
ATAGATAAAATTAGTTTGTGTTGATCATTCAAGCACATTATAGATAATATCCAAAAAGAAAGTTTCAAG  
GTGCCCCCTTGGACATATAAAACTTTGCCACGGTGCTAAACTTAAAAGAATGATCTTCCAAAAATACG  
GAATAGAATAATCTATTTTTAGAAAGAGAAGACTAAAATCGAGCGATACTATGAATGTCTGTTACAAA  
CTGAATTTTTGCACGTAACGAATACTTTGAAACAATCCTCAAAATCTTGTTTTGGTGTGTTGTCGAGTA  
GTCTTTACCAGGCCGAATCCTGTAGTTAAAATAATTTCTATTTGGACAACCTAAGGGTATCCCCTCA  
AGTTTGGCTTTTGTGTACCTTGTTCCGAAAGGCTCCGTTCTGCAATCTGCAGCAACCTTGTCAATTAG  
CTGTGTAATGCTCGCTGGTGTAGTAGCATAAGTCATTCCAATGGTAACTACCAAGCTTGTAAATAACC  
ACCAGCACCTCCATTCAGTAGTAGCAATGAGCAAGGTCGGAGATTGCTTTTAAGCGAGGTTTCAAAG  
TAATCTTGTAGTTTTGCTTTGTCGAAAAATGGCCACGGCTTACACATACAGTTTCGTCCACCAGATCTT  
TAGGCTTCATCAACAAAGTTTTCGACTTCGTTGTCTATAGGTTTTATTCTTTATCAGCGTCAGACTATG  
ATCGTACTAGTTTGTGAGCTGAAGCCCATCAGGATGTTTACCCTCCAGTTTTGTAATTTCCGCGGCTATC  
TAGGGCTACGTTGTCCATTGCCGAGTTTATATATGACATCACATTAGGCAGTAATCTCCATGCTTCTTT  
TTCGATAATGTTTTGGTCTAGGTTTCGTGCATGAAATTTTTTCTTCATCCAGACTATCTCTGCGCTGCAC  
TGTTACATAGCCAACCTGATACTGATTC-3'

ROR2 (2,699 bp)

5'-ACTTTTTCTTCATTTTAGAGCATTAGAGATGTCCCAGGAAGATTGATACTAACGTCGCTGTATGTGC  
TCAGGCACTGACGTGAGCGTACCTGTATTTTTCAGAACGTCCAAGAAGAGGAGTCGCCCCCTTCTCATC  
GTGGAGAATTGGTATTGAATATCTATGAATTAATAACCGATTGTTAGGTATTGTTGATATTATGCTGTGG  
CCCACATCATCCCTGTAAGTTTCCCTAACATCATGCTCTGGAACCTATAACGTATGGGTAGAACCTTGATC  
AATTGAAATTGGTAGAAGCAGTTATCTTCATATATTTTTCAGTATGAGGCCAGGAGATGTGTTTCCAG  
CCAATGACTTATACAAACAGCAGAAATTGAAACCGTAATATGACTCAATTTTTGTGATTTGTTTCATGT  
GTCATGAAAAAGAAGGTTTGTCTTTTCTCTCTGTTGTTTACTAATGGGCTAAAATCGACTTCGGTG  
AAAAATATTCACTTTAAAATTGAACTCAGCATTGACTATTCAAGAGCTAGAAATCCGATAAGAACGA  
TGTTGTCAAGTTATTGATCAGATCGTTTTTGGTTTTATCGACTAGTTCATCACCTAGTGACTTGTTCATAT  
TTGCACGCGTAATGTCTGAAAGCAGATCTAGTGTCTCTTTGAGCCTGGCCGCTATGTGGAGCACA  
AGACAAATGATATTTTGGTCCAGATATATTTGGTTTGGTAGGAGCAGAGTGGGTAACAGAAGTAAT  
TTCGTATCTCTTGTATAGATCCGTTTGCCTATGCCCAATCCCTTGCATACAAAGCACTTCGCCTTTC  
CAATACGGCATAGTAGGTAGCCTAATACATTTTATCCCTATTGATAGTAAATTTAGTAGCATGTAGATCT  
TTCGGCACACTCTCTGGCATCATTCATGTAAGCAGTCTTACAAAGTATTCTGTATCTACTTCTCTATTCA  
TTTTTTAAATGAACTAAGCAGGAGTTAACCATTTTCGAAAGCAATTCCTACTCCCTTCCCCCAAAAC  
AACTATACTATTTTTTGGTCCCTATGTGGGCTACTTGGAGGGATTGCTAATGCAAATATTTGAAAAC  
ACGCACTACTTACAAGACTGTGAATCGGAGGCTCCAAGCAACATACTGAACTTGTGCTGTTCTTTAA  
TGATTCATTCAGATAAAGTATTTAGTTGGGGCAAAGTTTTTAACACTCTCTTCTCATCCATGAATTTCA  
TTAGAGATCGATCCAATTCAAAGAATCTATCTCTGTATTCAGTATGACTTGGGAGCATGCATTGGGAC  
CTTTTGCATTTCCAACCTGAAGAGTGTGGTTACTTGGAAACACAGGGAAAGCGCCAACCATCCCTGAGG  
ATTATACAAAAGGGCTGTAAAAATAGAGTATATAATATCTGCTTATTCGTCTCCATGGTAAATATTGGTT  
GCTTCTGACAACCTGAACTCACAGTTTACTGAACATCTCTCTCCACTTAAAAAAAATATCCATTGG  
AGATGGAGATTGGAGACCCAGCCGAATGAACAAGCGGGAGCTTATTTGAGTGGTAGCTAAGCTAG  
TCGTGAAACTTAAATCTATGAGATTTACCTTGTTAAATTAGTAGGTTCTATTTTTTAAATATTATGATAG

CCCCGTCCTGGACAACATCATCAGAATCTTGATTGTTTATCATCGTTATTTCTTTTTGCACTACACTGAT  
TCAGGATTGGTCACTCTTTGATACCGATTAAAGTATCCGTAGGACGGTTACTATCGCAAATATTATGTT  
GAACTTTGCAGCTCCTTACAATTGCTATCAGAAGGAATTTGGATCCTCTCTTTAGAAGTTGCTCTTACA  
TTGATTACTCTTCAAAGAATTACCGGTCTATAAAGATGGAATTTCAATTCCTTGAAAGCTTTAAAGTT  
GTTCTAATTTGAGGTAGGATCTCCGGTAAAATCGGTTTGGGTTCAAATTTTAAACCTCGTCTTTCAAG  
ACACCCGAAATTAGCTTCCCCTGCAAGTTACAAATTATACTATTCGTGCCTCCCTGAGTCAATCATC  
GTAGTCGATTAATACATAACCACTACTATAAAGAATGGGCGTTTGAGGGCTGAGAGGATATGCAAATG  
ATACCGGTACTTAAATAAGGATTCGAGACTAGGACGGATATTCCGCTTCAAATTTGAGCAAACAGTA  
CAATAACTTAAGGCCGTGGAACAAAATTATATGGATTATACAAATTGCAATGCGCACGTAGTCCACTC  
TTGCCACTGGTTTTAGCGGTTAAAAACCGGGCAATTGAACAATAGCAATCTTTAGAAAACACCCG  
TCCACTTTAAAGTTTTGGGCACTGAAGGTCGACTGCGAAGGAACTGAGAATATAGCTTGCCGAGCTC  
TTATAGAATTAAGTAAAGTCTTTAA**C**ACCCTAATATACGCAATCGACCTAGTCCACTTGATCTTAGGGTC  
TCCAAAATTATATAGCGTATTTTATCACAAATTCATCATCTGTGCAACTCAACGCCGTCCATAAAAA  
CCAAAAGTGTACTCTGTGGAAATTTATCTACGTTTCGGTAGATTCTTTATAGGGTTGAATATTTCC  
TTTACACTTTACAATTTCTGAAATAGCGTTGCATTGTTATGCTGCCATACCGCAGCCCATCCACAAATC  
ATTGCTTCGCGCAAGTCACCTTGTTTGATTGG-3'

*PARS1* (164 bp)

5'-TCGAGATAAGCTGGGGGAACATTCGCGAAAATGAAACAAGTCGGCTGTTATAGTATATTTATTATAA  
TATTGAAAGATCTCAAAGACTACTTATTTTTGAATGAACCAAGTATGAAATCAACCTATTTGGGGTT  
GACCAAATAAGTAAATATTAATTGTCTGA-3'

Gray background; LOR2(1-111)

Bold red font; the different nucleotide between the LOR2 and ROR2.
